# Supplementary material
Source: publisher site journal article supplement (https://www.dovepress.com/article/381061)
Supplement: Supplementary file 1 [file get_supplementary_file.php]

**Supplementary Tables**

**Table 1: Comparison of BCVA, UCVA, and SE across study follow-up periods (n=300) (Supplementary material)**

|  | Baseline  Mean (SD) | First Follow-up  Mean (SD) | Second Follow-up  Mean (SD) | p-value* | p-value** |
| --- | --- | --- | --- | --- | --- |
| BCVA | 0.01 (0.03) | 0.01 (0.02) | 0.01 (0.03) | 0.052 | 0.967 |
| UCVA | 0.57 (0.37) | 0.64 (0.36) | 0.70 (0.36) | 0.001 | 0.001 |
| SE (D) | -2.62 (0.78) | -2.91 (0.68) | -3.35 (0.34) | 0.001 | 0.001 |

** Comparing Baseline and First Follow-up*

*** Comparing First and Second Follow-up*

*BCVA, best-corrected visual acuity; UCVA, uncorrected visual acuity; SE, spherical equivalence; SD, standard deviation; D, diopters*

**Table 2: Event rates of spherical equivalent progression for baseline characteristics (Supplementary material)**

| Characteristic |  | N (%) * | p-value |
| --- | --- | --- | --- |
| Age Group | 6–9 years | 70 (85) | 0.031 |
| 10–14 years | 151 (69) |
| Sex | Male | 97 (69) | 0.104 |
| Female | 124 (76) |
| Educational screen usage | Low | 25 (57) | 0.086 |
| Average | 105 (71) |
| High | 91 (84) |
| Recreational screen usage | Low | 49 (51) | 0.003 |
| Average | 56 (68) |
| High | 116 (95) |
| Device | TV | 22 (65) | 0.982 |
| Computer | 8 (57) |
| tablet | 49 (74) |
| Mobile phone | 142 (76) |
| Outdoor time | Insufficient | 209 (79) | 0.001 |
| Sufficient | 12 (33) |

**Percentages were calculated based on the number of patients in each baseline characteristic subgroup.*
